# Supplementary material
Source: PubMed Central journal article supplement (PMC3889389)

# Supplemental Figure 1

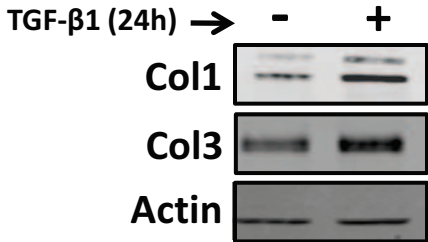

Supplement: 11302_2013_9368_MOESM1_ESM.pdf [file 11302_2013_9368_MOESM1_ESM.pdf]

# Supplemental Figure 2

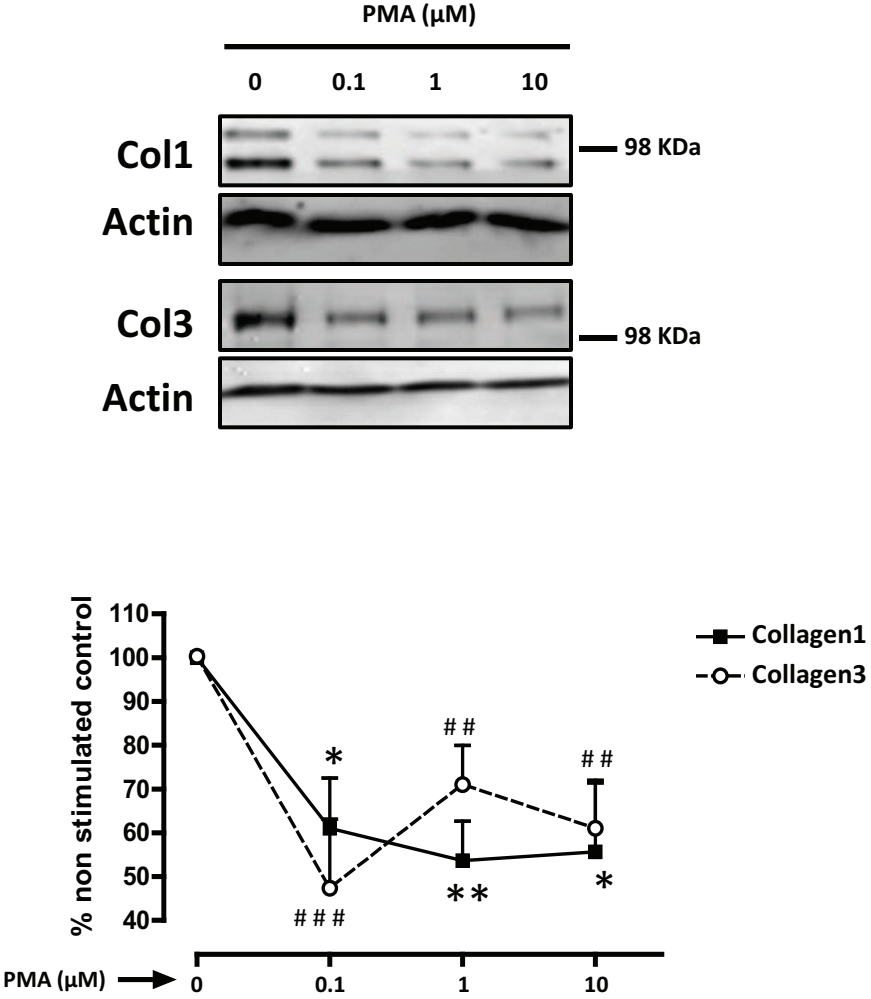

Supplement: 11302_2013_9368_MOESM2_ESM.pdf [file 11302_2013_9368_MOESM2_ESM.pdf]
